# Supplementary material for: PDIA5 is Correlated With Immune Infiltration and Predicts Poor Prognosis in Gliomas
Source: PubMed Central journal article supplement (PMC7921737; doi:10.3389/fimmu.2021.628966), 2021-02-16
Supplement: DataSheet_1.pdf [file DataSheet_1.pdf]

## Supplementary Material

### Supplementary Figures and Tables

#### Supplementary Figures

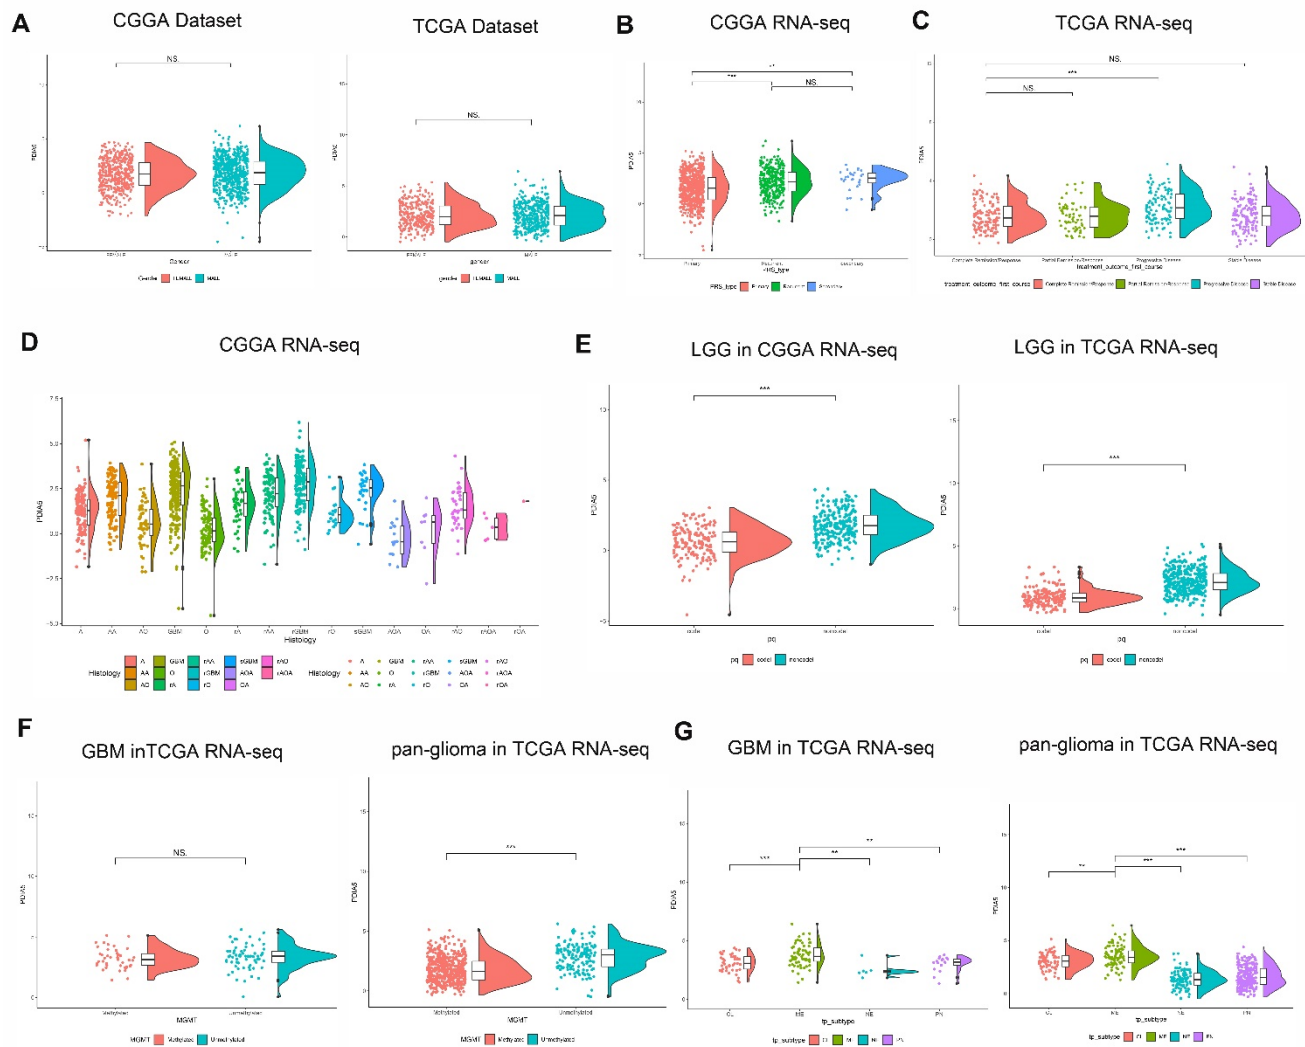

**Supplementary Figure S1.** Clinical and molecular characteristics of PDIA5 in gliomas. **A.** The relationship between PDIA5 expression and gender in the CGGA and TCGA datasets. **B.** The expression levels of PDIA5 among primary gliomas, recurrent gliomas, and secondary gliomas from the CGGA dataset. **C.** PDIA5 expression in different treatment outcome groups from the TCGA dataset. **D.** The expression levels of PDIA5 increased by the histopathologic classification in the CGGA dataset. **E.** PDIA5 expression was upregulated with 1p/19q non-codeletion status in LGG from the CGGA and TCGA datasets. **F.** PDIA5 expression was upregulated in MGMT promoter unmethylated samples of pan-gliomas but not GBM in the TCGA dataset. **G.** The PDIA5 expression pattern in the molecular

subtypes of GBM and pan-gliomas from TCGA. CL, classical; MES, mesenchymal; PN, pro-neural; NE, neural. \*\* P <.01, \*\*\* P <.001, ns. p>.05.

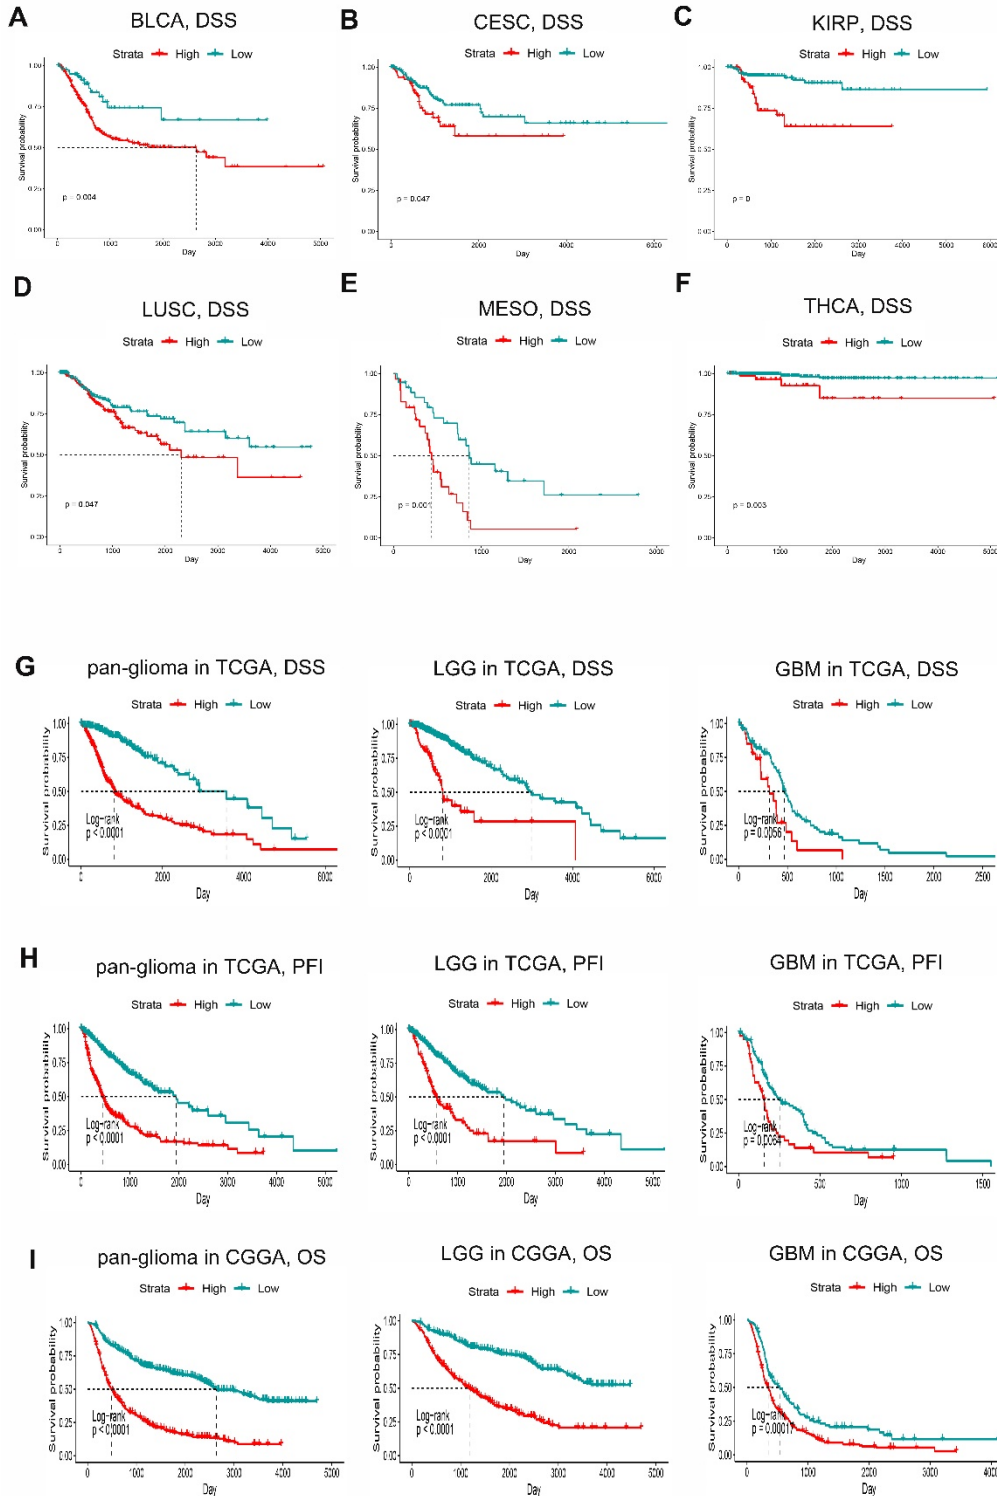

**Supplementary Figure S2.** Kaplan-Meier survival curves comparing high and low expression of PDIA5 in different cancers using Kaplan-Meier Plotter. DSS of Bladder urothelial carcinoma (BLCA)

(**A**), Cervical and endocervical cancers (CESC) (**B**), Kidney renal papillary cell carcinoma (KIRP) (**C**), Lung squamous cell carcinoma (LUSC) (**D**), Mesothelioma (MESO) (**E**) and Thyroid carcinoma (THCA) (**F**). **G**. Kaplan-Meier analysis of DSS based on high vs low expression of PDIA5 in pan-glioma, LGG and GBM patients in the TCGA dataset. **H**. Kaplan-Meier analysis of PFI based on high vs low expression of PDIA5 in pan-glioma, LGG and GBM patients in the TCGA dataset. **I**. Kaplan-Meier analysis of overall survival (OS) based on high vs low expression of PDIA5 in pan-glioma, LGG and GBM patients in the CGGA dataset. The red curve represents patients with high expression of PDIA5, and the green curve represents patients with low expression of PDIA5. OS, overall survival; DSS, disease specific survival; PFI, progression-free interval.

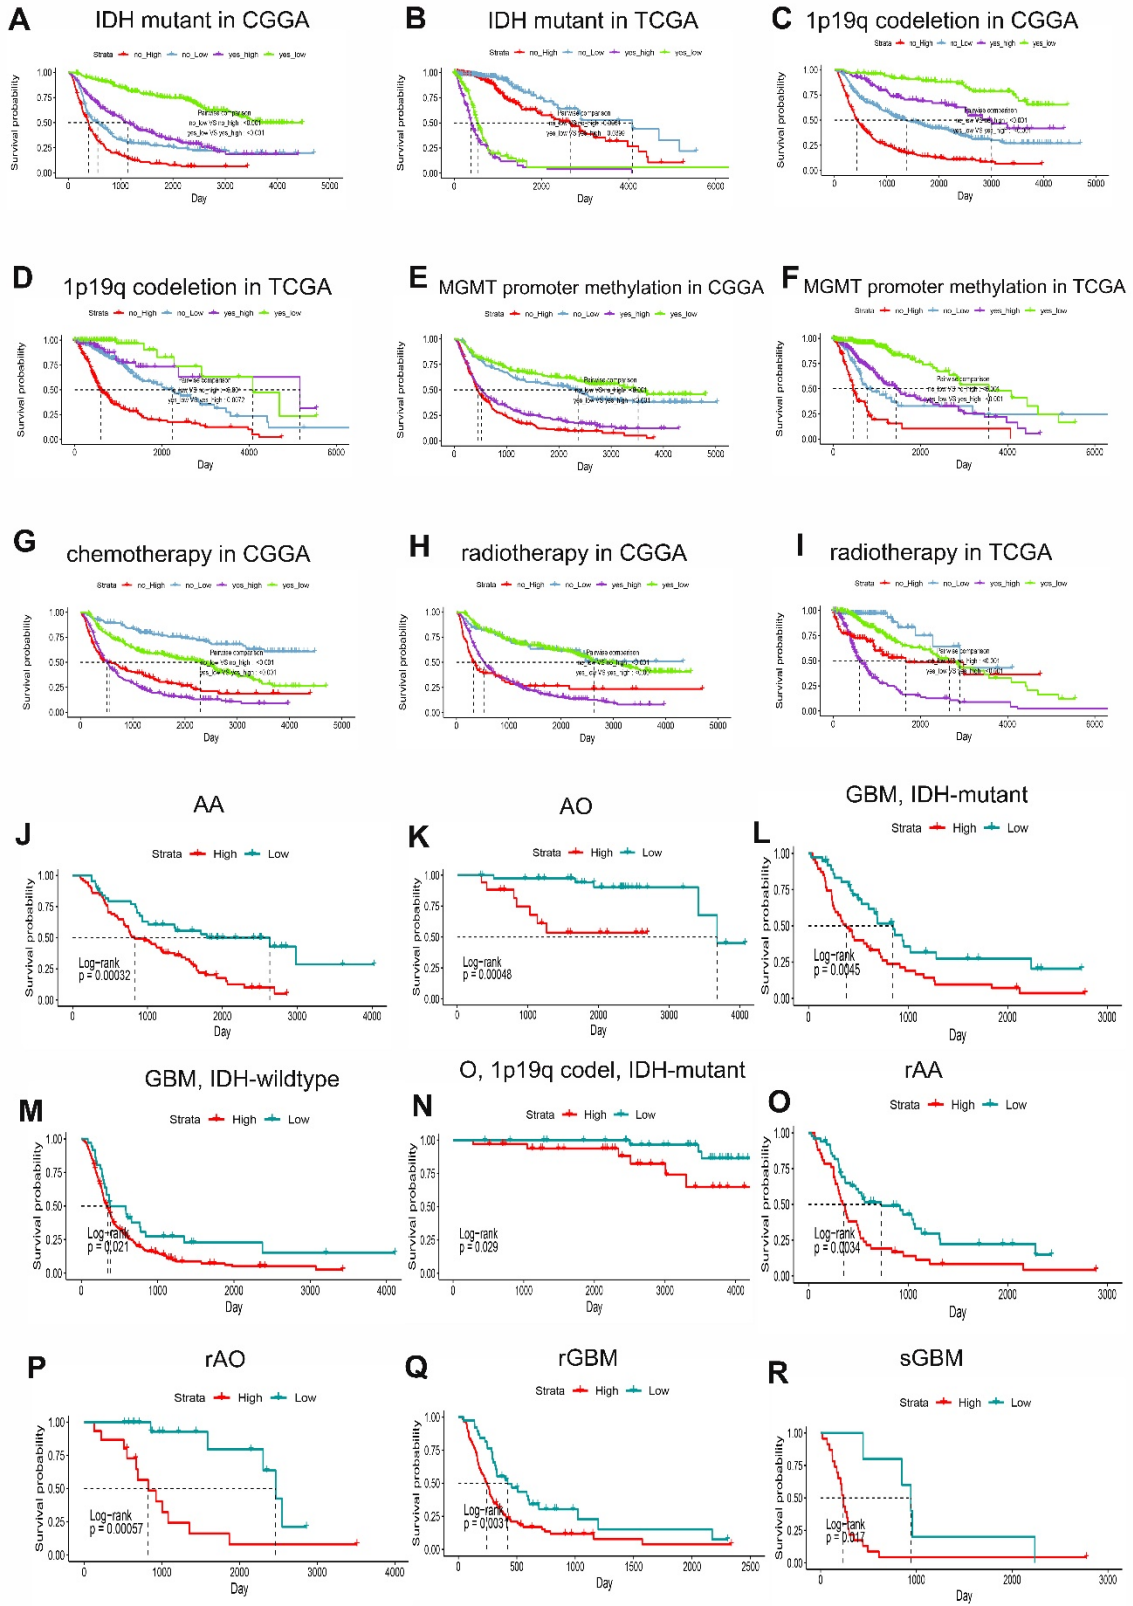

**Supplementary Figure S3.** Kaplan-Meier survival curves comparing high and low expression of PDIA5 in gliomas based on different molecular markers and treatments. IDH mutant status in CGGA(A)

and TCGA(B) datasets. 1p19q codeletion status in CGGA(C) and TCGA(D) datasets. MGMT promoter methylation status in CGGA(E) and TCGA(F) datasets. Chemotherapy in the CGGA dataset(G). Radiotherapy in the CGGA(H) and TCGA(I) datasets. Kaplan-Meier overall survival curves for patients with anaplastic astrocytoma (AA)(J), anaplastic oligodendrocytoma (AO)(K), GBM with IDH-mutation(L), GBM with wildtype IDH(M), oligodendroglioma(O) with 1p/19q codeletion and IDH-mutation(N), recurrent anaplastic astrocytoma (rAA)(O), recurrent anaplastic oligodendrocytoma (rAO)(P), recurrent GBM (rGBM)(Q) and secondary GBM (sGBM)(R). The red curve represents patients with high expression of PDIA5, and the green curve represents patients with low expression of PDIA5.

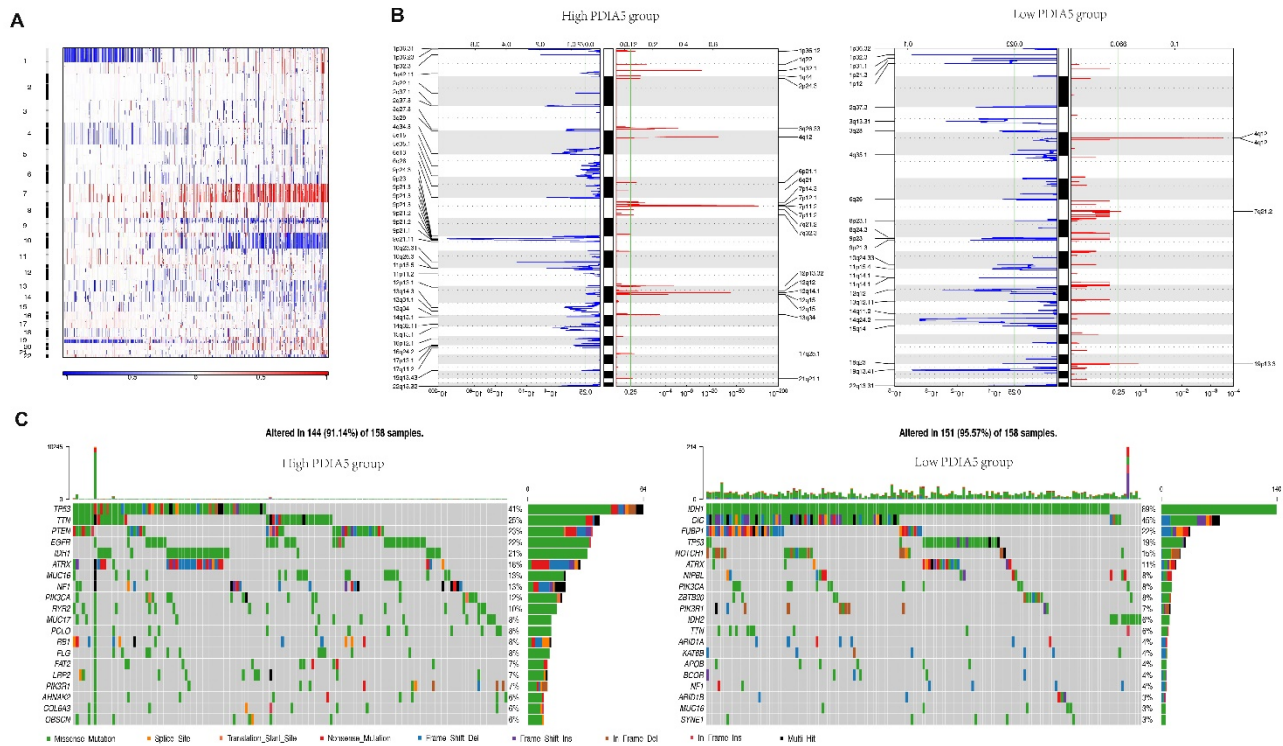

**Supplementary Figure S4.** PDIA5 expression correlates with distinct genomic alterations. **A.** Overall copy number variation (CNV) profile according to high vs low PDIA5 expression. **B.** GISTIC 2.0 amplifications and deletions in gliomas with high and low PDIA5 expression. **C.** Differential somatic mutations were detected in gliomas with high and low PDIA5 expression. Red represents amplification and blue represents deletion.

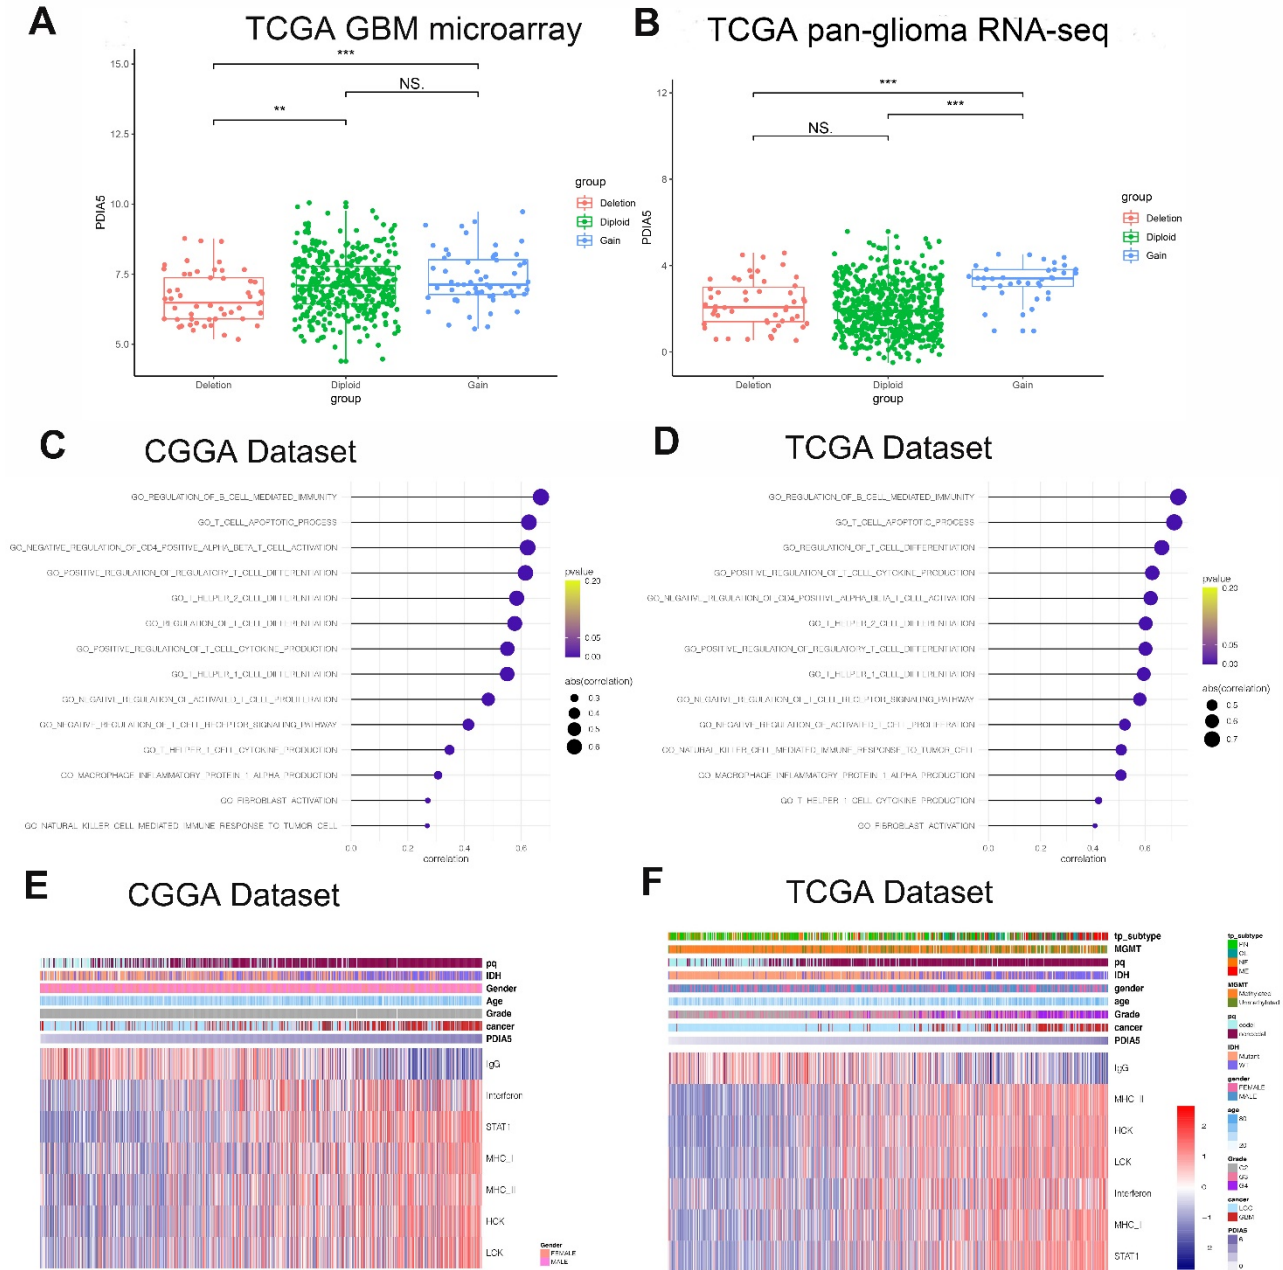

**Supplementary Figure S5.** Relationship between PDI A5 expression and PDI A5 copy number in **A**. GBM microarray data from the TCGA dataset. **B**. pan-glioma RNA-seq data from the TCGA dataset. \*  $P < .05$ , \*\*  $P < .01$ , \*\*\*  $P < .001$ , ns.  $p > .05$ . **C**, **D**. Correlation of PDI A5 and immunity pathways in the CGGA and TCGA datasets. **E**, **F**. The relationship between PDI A5 and inflammatory activities in the CGGA and TCGA datasets. Expression values are z-transformed and are highlighted in red for high expression and blue for low expression as indicated in the scale bar.



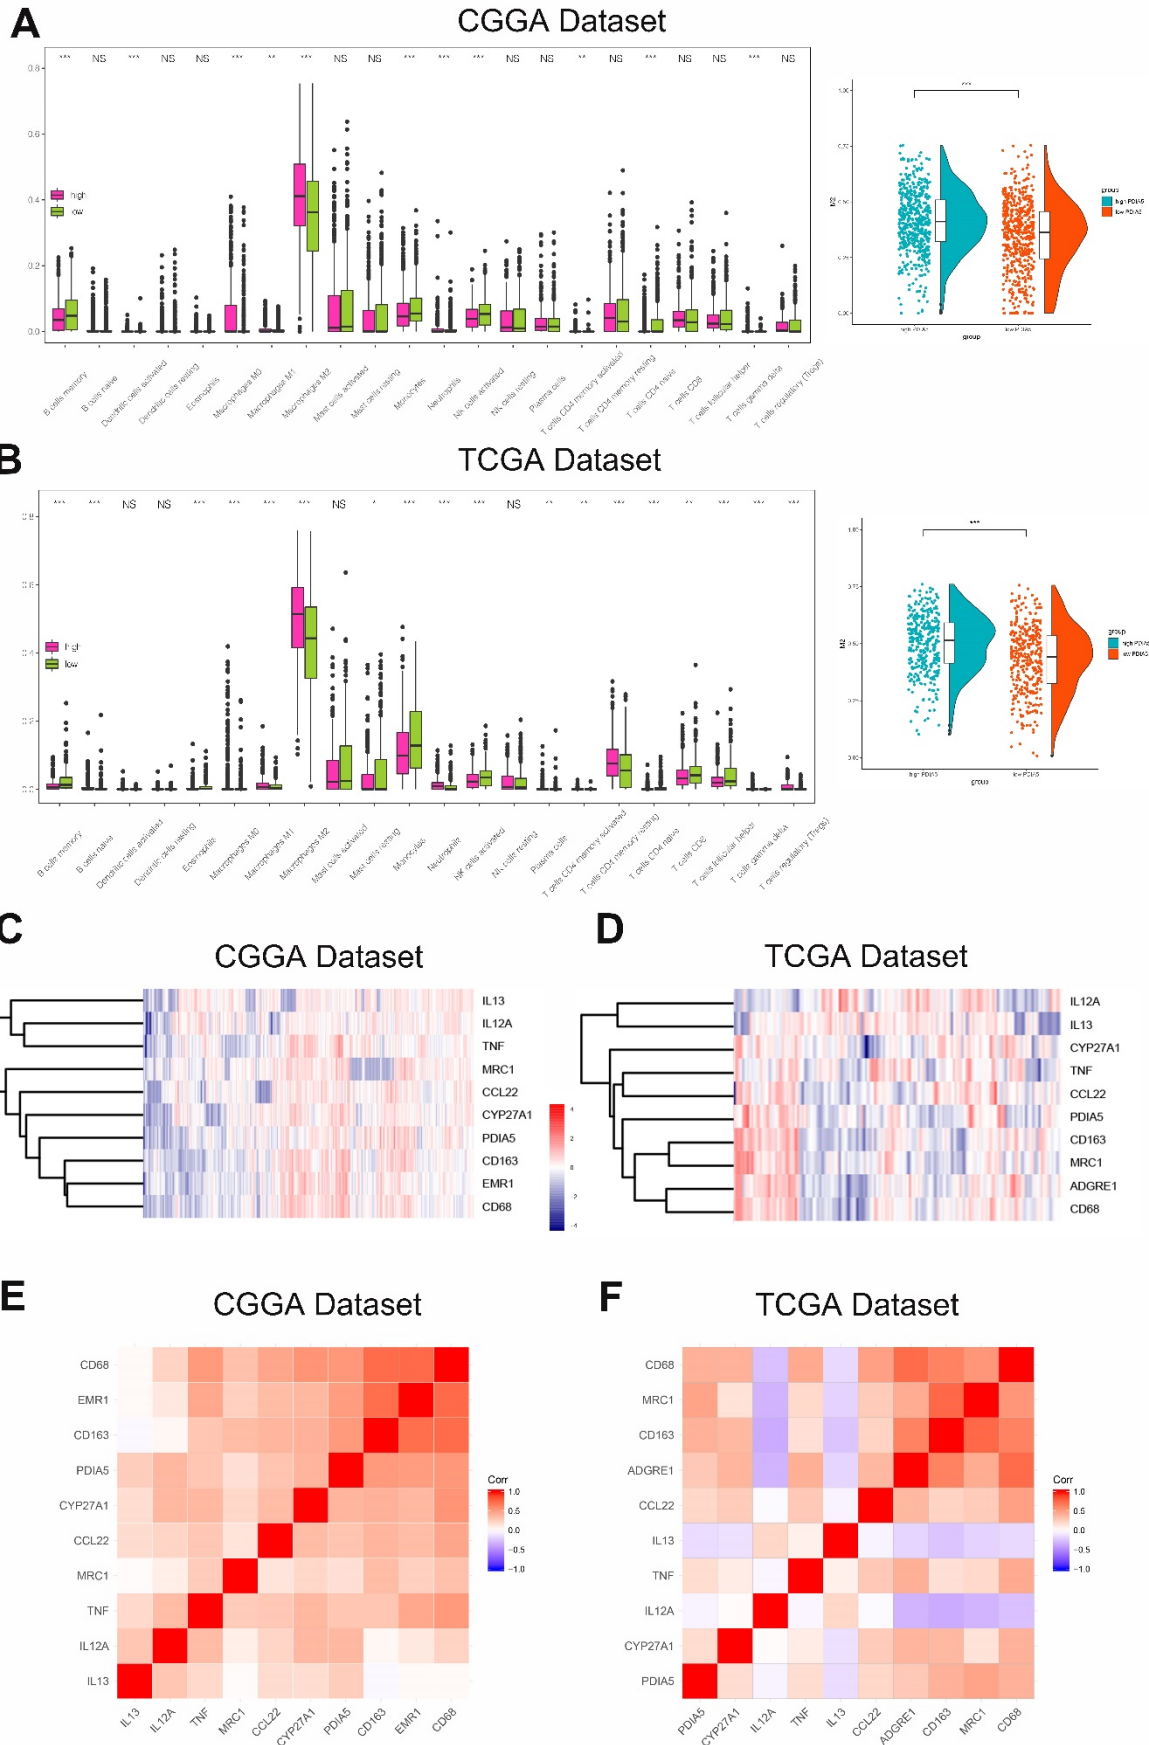



**Supplementary Figure S7.** The association between PDIA5 and macrophages in gliomas. The differences in expression value for 22 immune cells between high and low expression of PDIA5 group in the CGGA (A) and TCGA (B) datasets. Heatmap of PDIA5 and macrophage markers in gliomas from the CGGA (C) and TCGA (D) datasets. Correlation analysis between PDIA5 and macrophage markers in the CGGA (E) and TCGA (F) datasets.

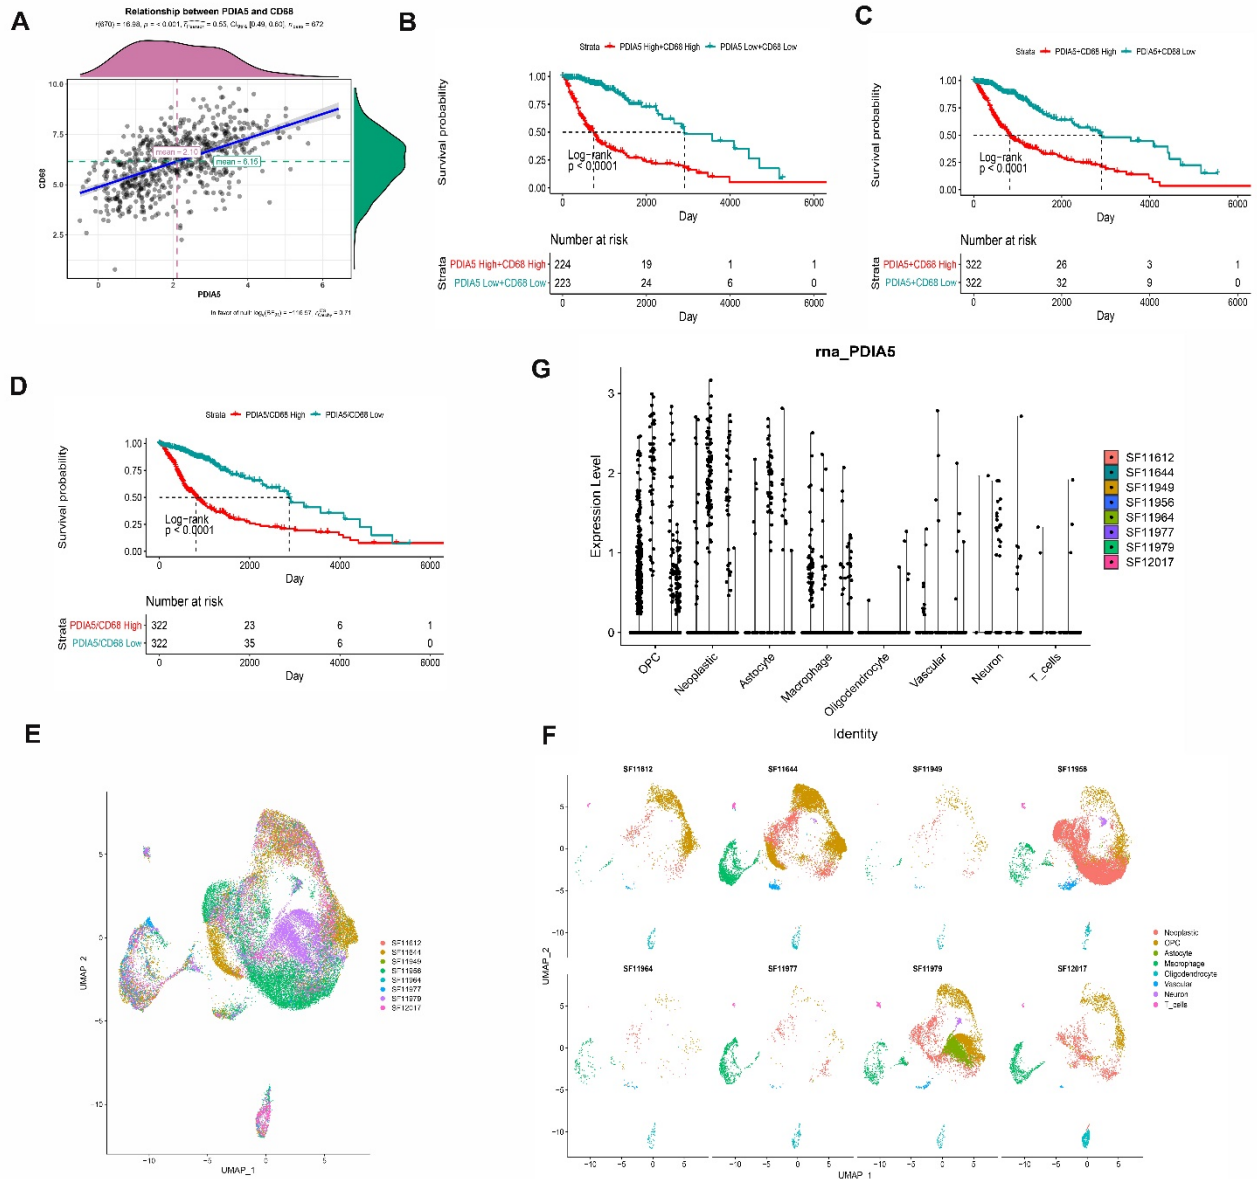

**Supplementary Figure S8.** The relationship between PDIA5 and CD68 as well as the scRNA-seq results of PDIA5 in gliomas. **A.** correlation analysis between PDIA5 and CD68 in gliomas. **B.** Kaplan-Meier analysis of OS based on high vs low expression of PDIA5 and CD68 in gliomas. **C.** Kaplan-Meier analysis of OS based on high vs low combined sum of PDIA5 and CD68 expression in gliomas. **D.** Kaplan-Meier analysis of OS based on high vs low ratio of PDIA5 to CD68 in gliomas. The red curve represents high expression, and the blue curve represents low expression. **E.** Representative merged image showing the data from 8 glioma samples. **F.** Eight clusters of cells, including neoplastic cells, oligodendrocyte precursor cells (OPC), astrocytes, macrophages, oligodendrocytes, vascular

endothelial cells, neurons, and T cells were identified from the eight glioma samples. **G.** Violin plot of the PDIA5 expression distribution of different glioma samples.

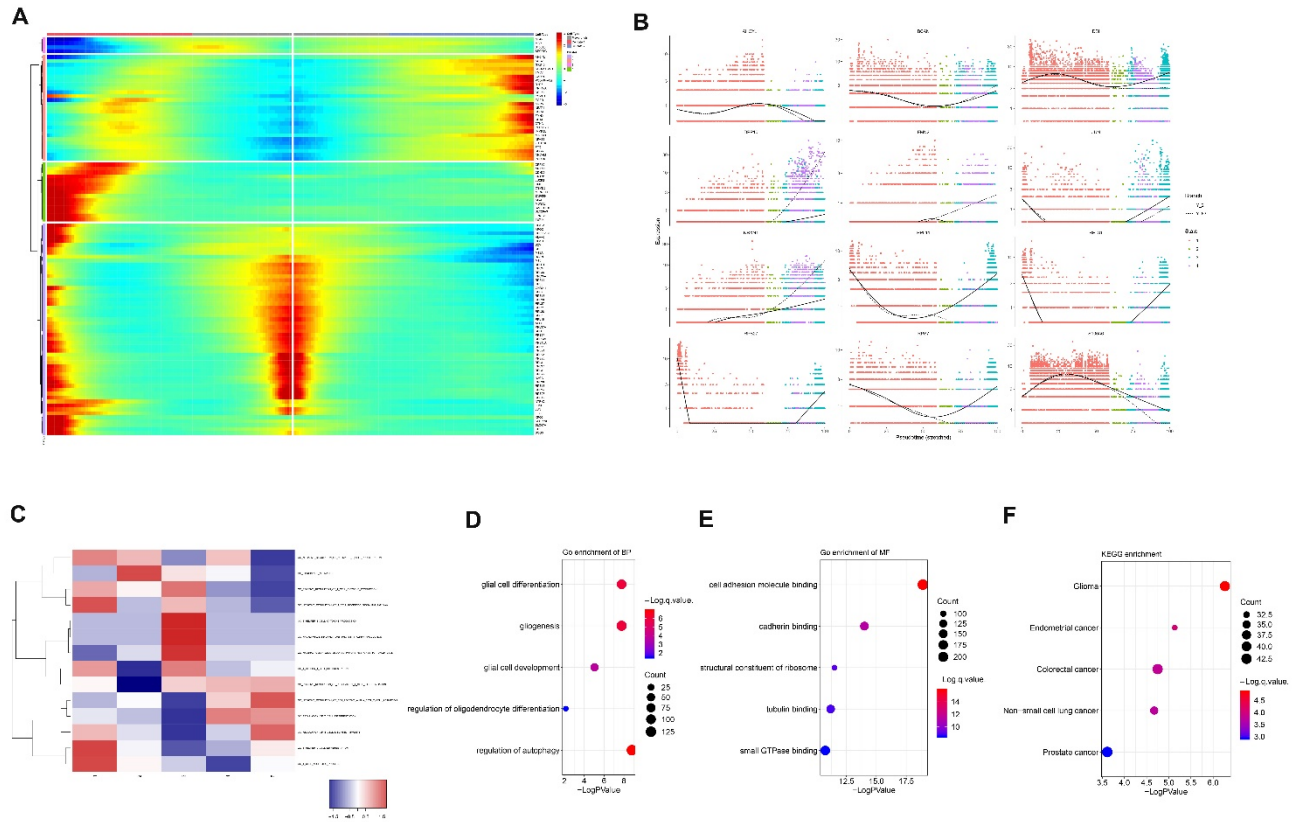

**Supplementary Figure S9.** Single-cell pseudotime trajectories and functional annotations of neoplastic cells in gliomas. **A.** 100 genes with branch-dependent expression for branch point 1 were identified. **B.** the top 12 genes with branch-dependent expression for branch point 1. **C.** GSEA of neoplastic cells for PDIA5 in each state. The red color represents positive correlation, and the blue color represents negative correlation. **D.** Representative images of biological processes (BP) from GO enrichment analysis based on PDIA5 in neoplastic cells. **E.** Representative image of molecular functions (MF) from GO enrichment analysis based on PDIA5 in neoplastic cells. **F.** Representative image of KEGG pathway analysis based on PDIA5 in neoplastic cells.

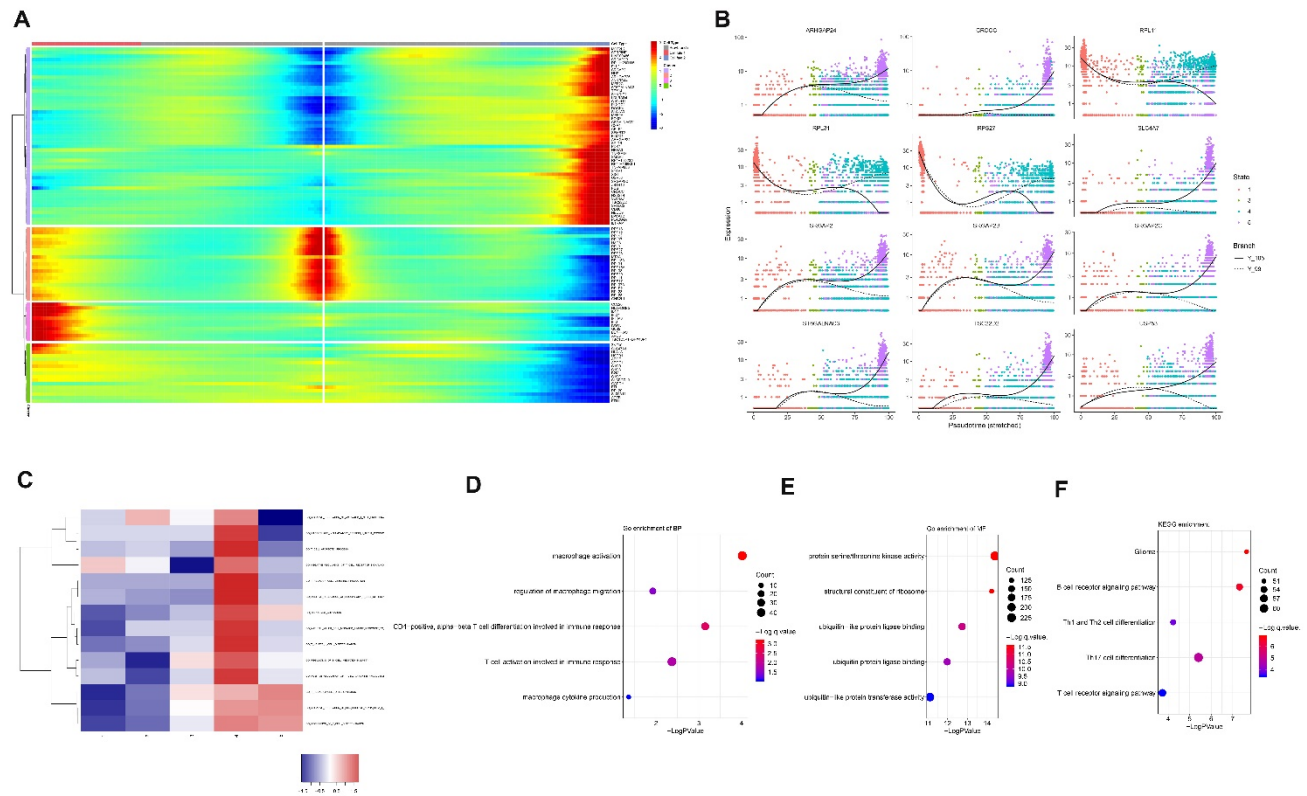

**Supplementary Figure S10.** The Single-cell pseudotime trajectories and functional annotations of macrophages in gliomas. **A.** 100 genes with branch-dependent expression for branch point 2 were identified. **B.** the top 12 genes with branch-dependent expression for branch point 2. **C.** GSEA with macrophages for PDIA5 in each state. The red color represents positive correlation, and the blue color represents negative correlation. **D.** Representative image of biological processes (BP) from GO enrichment analysis based on PDIA5 in macrophage. **E.** Representative image of molecular functions (MF) from GO enrichment analysis based on PDIA5 in macrophages. **F.** Representative image of KEGG pathway analysis based PDIA5 in macrophages.

## Supplementary Tables

**Table S1.** Demographics and clinical characteristics of gliomas patients from Xiangya Hospital

**Table S2.** The correlation between PDIA5 and GO pathways in gliomas.

**Table S3.** GO enrichment analysis of biological process based on PDIA5 in neoplastic cells.

**Table S4.** GO enrichment analysis of molecular function based on PDIA5 in neoplastic cells

**Table S5.** KEGG pathway analysis based on PDIA5 in neoplastic cells.

**Table S6.** GO enrichment analysis of biological process based on PDIA5 in macrophages.

**Table S7.** GO enrichment analysis of molecular function based on PDIA5 in macrophages.

**Table S8.** KEGG pathway analysis based on PDIA5 in macrophages.

**Table S1** Demographics and clinical characteristics of gliomas patients from Xiangya Hospital

| Wax code | Pathologic Level in slices | XYNS Tissue bank code | Gender | Age | Lesion Location          | Score | PDIA5 Expression Area | PDIA5 Expression Intensity |
|----------|----------------------------|-----------------------|--------|-----|--------------------------|-------|-----------------------|----------------------------|
| GT1      | I                          | 130805W35G1           | M      | 34  | R-front lobe             | 0     | 0                     | 0                          |
| GTR2     | IV                         | 130816W37G1R          | M      | 44  | L-parieto lobe           | 9     | 3                     | 3                          |
| GT3      | II                         | 130819W35G1           | M      | 65  | L-parieto lobe           | 3     | 1                     | 3                          |
| GT4      | II                         | 130821W37G1           | M      | 43  | R-front lobe             | 3     | 1                     | 3                          |
| GT5      | II                         | 130822W37G2           | M      | 29  | cauda cerebelli          | 1     | 1                     | 1                          |
| GT6      | IV                         | 130829W37G1           | M      | 74  | R-frontal-parieto lobe   | 9     | 3                     | 3                          |
| GT7      | IV                         | 130830W35G2           | M      | 44  | L-frontal lobe           | 6     | 2                     | 3                          |
| GT8      | IV                         | 130918W37G3           | M      | 75  | L-front lobe             | 6     | 2                     | 3                          |
| GT10     | II                         | 130926W37G1           | M      | 50  | R-front lobe             | 4     | 2                     | 2                          |
| GT13     | III                        | 130929W35G3           | M      | 64  | R-temporal-insular lobe  | 0     | 2                     | 1                          |
| GTR14    | II                         | 130929W37G1R          | M      | 43  | R-frontal lobe           | 4     | 2                     | 2                          |
| GT15     | III                        | 130930W35G1           | M      | 71  | R-parieto-occipital lobe | 4     | 2                     | 2                          |
| GT17     | IV                         | 131014W37G1           | F      | 69  | L-occipital lobe         | 6     | 2                     | 3                          |
| GT18     | II                         | 131015W37G1           | M      | 17  | L-temporal lobe          | 0     | 2                     | 0                          |
| GT20     | III                        | 131029W37G1           | M      | 55  | R-temporal lobe          | 2     | 1                     | 2                          |
| GT22     | III                        | 131031W37G2           | M      | 54  | L-frontal lobe           | 4     | 2                     | 2                          |
| GT23     | III                        | 131104W39G1           | M      | 42  | L-frontal lobe           | 4     | 2                     | 2                          |
| GT24     | III                        | 131108W37G1           | M      | 43  | L-frontal lobe           | 2     | 2                     | 1                          |
| GT28     | III                        | 131114W39G2           | M      | 36  | R-frontal lobe           | 6     | 2                     | 3                          |
| GT29     | IV                         | 131115W35G1           | M      | 34  | R-temporal lobe          | 9     | 3                     | 3                          |
| GT30     | II                         | 131115W36G1           | M      | 1.4 | R-temporal lobe          | 2     | 1                     | 2                          |
| GT31     | I                          | 131115W36G2           | M      | 42  | L-front lobe             | 0     | 0                     | 2                          |
| GT32     | II                         | 131115W37G1           | F      | 45  | L-front lobe             | 0     | 2                     | 0                          |
| GTR34    | III                        | 131118W37G1R          | F      | 36  | R-frontal lobe           | 4     | 2                     | 2                          |
| GT35     | IV                         | 131120W37G1           | M      | 61  | L-parieto lobe           | 9     | 3                     | 3                          |
| GT38     | IV                         | 131121W37G1           | M      | 72  | L-temporal-parieto lobe  | 6     | 2                     | 3                          |
| GT40     | III                        | 131125W37G2           | F      | 37  | R-parieto lobe           | 6     | 2                     | 3                          |
| GT42     | IV                         | 131202W37G1           | F      | 74  | R-parieto-occipital lobe | 9     | 3                     | 3                          |
| GT43     | III                        | 131204W37G1           | M      | 39  | L-frontal lobe           | 4     | 2                     | 2                          |
| GT45     | IV                         | 131206W39G1           | M      | 39  | R-frontal lobe           | 4     | 2                     | 2                          |
| GT47     | II                         | 131211W37G1           | M      | 34  | L-frontal-temporal lobe  | 4     | 2                     | 2                          |

**Table S2** The correlation between PDIA5 and GO pathways in gliomas

|      | symbol                                                                                                                                                                                                                                              | correlation in pan-glioma | pvalue in pan-glioma  | correlation in GBM | pvalue in GBM        |
|------|-----------------------------------------------------------------------------------------------------------------------------------------------------------------------------------------------------------------------------------------------------|---------------------------|-----------------------|--------------------|----------------------|
| 7349 | PDIA5                                                                                                                                                                                                                                               | 1                         | 0                     | 1                  | 0                    |
| 5235 | GO_REGULATI<br>ON_OF_B_CELL<br>_MEDIATED_IM<br>MUNITY                                                                                                                                                                                               | 0.72731205                | 1.24095366106935E-111 | 0.541056131        | 8.80786059274451E-13 |
| 3343 | GO_NEGATIVE_<br>REGULATION_<br>OF_T_CELL_RE<br>CEPTOR_SIGNA<br>LING_PATHWA<br>GO_POSITIVE_<br>REGULATION_<br>OF_REGULATO<br>RY_T_CELL_DI<br>FFERENTIATIO<br>GO_NEGATIVE_<br>REGULATION_<br>OF_CD4_POSITI<br>VE_ALPHA_BE<br>TA_T_CELL_AC<br>TIVATION | 0.57993449                | 1.20057760266358E-61  | 0.405101749        | 2.71623075536244E-07 |
| 4607 | GO_REGULATI<br>ON_OF_T_CELL<br>_DIFFERENTIA<br>TION_IN_THYM<br>GO_T_HELPER_<br>2_CELL_DIFFER<br>ENTIATION                                                                                                                                           | 0.6018193                 | 1.90784483807895E-67  | 0.333375675        | 3.06293434741598E-05 |
| 2767 | GO_T_HELPER_<br>1_CELL_DIFFER<br>ENTIATION                                                                                                                                                                                                          | 0.62129118                | 5.37253782850929E-73  | 0.569814953        | 2.74026136051458E-14 |
| 6227 | GO_POSITIVE_<br>REGULATION_<br>OF_T_CELL_CY<br>TOKINE_PROD<br>UCTION                                                                                                                                                                                | 0.26718887                | 1.89704903537395E-12  | 0.480029141        | 5.10581401238836E-10 |
| 7031 | GO_T_HELPER_<br>1_CELL_DIFFER<br>ENTIATION                                                                                                                                                                                                          | 0.60256428                | 1.18905011290499E-67  | 0.452043145        | 6.36768065510894E-09 |
| 7026 | GO_T_HELPER_<br>1_CELL_CYTOK<br>INE_PRODUCTI<br>ON                                                                                                                                                                                                  | 0.59534351                | 1.1039410094545E-65   | 0.500669951        | 6.82419645461363E-11 |
| 4694 | GO_POSITIVE_<br>REGULATION_<br>OF_T_CELL_CY<br>TOKINE_PROD<br>UCTION                                                                                                                                                                                | 0.62760136                | 7.02053185576331E-75  | 0.481209816        | 4.566929614055E-10   |
| 7009 | GO_T_HELPER_<br>1_CELL_CYTOK<br>INE_PRODUCTI<br>ON                                                                                                                                                                                                  | 0.71148028                | 9.42603182420773E-105 | 0.48467418         | 3.28412848258736E-10 |
| 7025 | GO_T_HELPER_<br>1_CELL_CYTOK<br>INE_PRODUCTI<br>ON                                                                                                                                                                                                  | 0.42201263                | 2.11731315029073E-30  | 0.230060933        | 0.00462317           |
| 2217 | GO_MACROPH<br>AGE_INFLAMM<br>ATORY_PROTEI<br>N_1_ALPHA_PR<br>ODUCTION                                                                                                                                                                               | 0.5075601                 | 2.76532058961897E-45  | 0.292235481        | 0.000284807          |
| 2668 | GO_NATURAL_<br>KILLER_CELL_<br>MEDIATED_IM<br>MUNE_RESPON<br>SE_TO_TUMOR                                                                                                                                                                            | 0.50862158                | 1.69553036568869E-45  | 0.272100885        | 0.000755919          |
| 1506 | GO_FIBROBLAS<br>T_ACTIVATION<br>GO_NEGATIVE_<br>REGULATION_<br>OF_ACTIVATED<br>_T_CELL_PROLI<br>FERATION                                                                                                                                            | 0.40851581                | 2.04405857801024E-28  | 0.360676245        | 5.788498640275E-06   |
| 2688 | GO_FIBROBLAS<br>T_ACTIVATION<br>GO_NEGATIVE_<br>REGULATION_<br>OF_ACTIVATED<br>_T_CELL_PROLI<br>FERATION                                                                                                                                            | 0.52257206                | 2.32592217318822E-48  | 0.330896386        | 3.53635069235981E-05 |

**Table S3** GO enrichment analysis of biological process based on PDIA5 in neoplastic cells

| <b>ID</b>  | <b>Description</b>                                                                            | <b>GeneRatio</b> | <b>BgRatio</b> | <b>pvalue</b> | <b>p.adjust</b> | <b>qvalue</b> |
|------------|-----------------------------------------------------------------------------------------------|------------------|----------------|---------------|-----------------|---------------|
| GO:0010001 | glial cell differentiation                                                                    | 91/4591          | 218/18670      | 1.68E-08      | 1.31E-06        | 9.84E-07      |
| GO:0042063 | gliogenesis                                                                                   | 114/4591         | 290/18670      | 1.70E-08      | 1.31E-06        | 9.84E-07      |
| GO:0021782 | glial cell development                                                                        | 50/4591          | 116/18670      | 9.16E-06      | 0.0002426       | 0.0001829     |
| GO:0048713 | regulation of oligodendrocyte differentiation                                                 | 17/4591          | 39/18670       | 0.007194      | 0.0441991       | 0.0333133     |
| GO:1904925 | positive regulation of autophagy of mitochondrion in response to mitochondrial depolarization | 6/4591           | 13/18670       | 0.074763      | 0.224849        | 0.1694709     |

**Table S4** GO enrichment analysis of molecular function based on PDIA5 in neoplastic cells

| <b>ID</b>  | <b>Description</b>                 | <b>GeneRatio</b> | <b>BgRatio</b> | <b>pvalue</b> | <b>p.adjust</b> | <b>qvalue</b> |
|------------|------------------------------------|------------------|----------------|---------------|-----------------|---------------|
| GO:0050839 | cell adhesion molecule binding     | 221/4577         | 499/17697      | 1.30E-19      | 1.52E-16        | 1.27E-16      |
| GO:0045296 | cadherin binding                   | 150/4577         | 331/17697      | 9.84E-15      | 5.75E-12        | 4.80E-12      |
| GO:0003735 | structural constituent of ribosome | 98/4577          | 202/17697      | 3.20E-12      | 1.25E-09        | 1.04E-09      |
| GO:0015631 | tubulin binding                    | 144/4577         | 336/17697      | 6.60E-12      | 1.93E-09        | 1.61E-09      |
| GO:0031267 | small GTPase binding               | 178/4577         | 443/17697      | 1.86E-11      | 4.36E-09        | 3.64E-09      |

**Table S5** KEGG pathway analysis based on PDIA5 in neoplastic cells

| <b>ID</b> | <b>Description</b>         | <b>GeneRatio</b> | <b>BgRatio</b> | <b>pvalue</b> | <b>p.adjust</b> | <b>qvalue</b> |
|-----------|----------------------------|------------------|----------------|---------------|-----------------|---------------|
| hsa05214  | Glioma                     | 41/2206          | 75/8041        | 5.41E-07      | 2.21E-05        | 1.43E-05      |
| hsa05213  | Endometrial cancer         | 32/2206          | 58/8041        | 7.31E-06      | 0.000138499     | 8.92E-05      |
| hsa05210  | Colorectal cancer          | 42/2206          | 86/8041        | 1.79E-05      | 0.000261462     | 0.000168382   |
| hsa05223  | Non-small cell lung cancer | 35/2206          | 68/8041        | 2.13E-05      | 0.000298343     | 0.000192133   |
| hsa05215  | Prostate cancer            | 43/2206          | 97/8041        | 0.000244016   | 0.00187079      | 0.001204791   |



**Table S6** GO enrichment analysis of biological process based on PDIA5 in macrophages

| <b>ID</b>  | <b>Description</b>                                                          | <b>GeneRatio</b> | <b>BgRatio</b> | <b>pvalue</b> | <b>p.adjust</b> | <b>qvalue</b> |
|------------|-----------------------------------------------------------------------------|------------------|----------------|---------------|-----------------|---------------|
| GO:0042116 | macrophage activation                                                       | 49/6086          | 95/18670       | 9.62E-05      | 0.001011106     | 0.000683085   |
| GO:1905521 | regulation of macrophage migration                                          | 20/6086          | 39/18670       | 0.011876182   | 0.04770489      | 0.032228552   |
| GO:0002294 | CD4-positive, alpha-beta T cell differentiation involved in immune response | 32/6086          | 60/18670       | 0.000708894   | 0.005057352     | 0.003416655   |
| GO:0002287 | alpha-beta T cell activation involved in immune response                    | 32/6086          | 61/18670       | 0.001029014   | 0.0069048       | 0.004664757   |
| GO:0010934 | macrophage cytokine production                                              | 9/6086           | 16/18670       | 0.043466958   | 0.125205854     | 0.084586787   |

**Table S7** GO enrichment analysis of molecular function based on PDIA5 in macrophages

| <b>ID</b>      | <b>Description</b>                             | <b>GeneRatio</b> | <b>BgRatio</b> | <b>pvalue</b> | <b>p.adjust</b> | <b>qvalue</b> |
|----------------|------------------------------------------------|------------------|----------------|---------------|-----------------|---------------|
| GO:000467<br>4 | protein serine/threonine<br>kinase activity    | 231/6128         | 439/17697      | 4.05E-15      | 3.53E-12        | 2.66E-12      |
| GO:000373<br>5 | structural constituent of<br>ribosome          | 124/6128         | 202/17697      | 5.95E-15      | 3.53E-12        | 2.66E-12      |
| GO:004438<br>9 | ubiquitin-like protein<br>ligase binding       | 169/6128         | 308/17697      | 1.87E-13      | 7.39E-11        | 5.57E-11      |
| GO:003162<br>5 | ubiquitin protein ligase<br>binding            | 159/6128         | 290/17697      | 1.05E-12      | 3.12E-10        | 2.35E-10      |
| GO:001978<br>7 | ubiquitin-like protein<br>transferase activity | 207/6128         | 407/17697      | 7.76E-12      | 1.84E-09        | 1.39E-09      |

**Table S8** KEGG pathway analysis based on PDIA5 in macrophages

| <b>ID</b> | <b>Description</b>                | <b>GeneRatio</b> | <b>BgRatio</b> | <b>pvalue</b> | <b>p.adjust</b> | <b>qvalue</b> |
|-----------|-----------------------------------|------------------|----------------|---------------|-----------------|---------------|
| hsa05214  | Glioma                            | 51/2923          | 75/8041        | 2.25E-08      | 2.70E-07        | 1.41E-07      |
| hsa04662  | B cell receptor signaling pathway | 54/2923          | 82/8041        | 4.80E-08      | 5.34E-07        | 2.79E-07      |
| hsa04658  | Th1 and Th2 cell differentiation  | 52/2923          | 92/8041        | 5.89E-05      | 0.000267764     | 0.00013962    |
| hsa04659  | Th17 cell differentiation         | 62/2923          | 107/8041       | 3.92E-06      | 2.69E-05        | 1.40E-05      |
| hsa04660  | T cell receptor signaling pathway | 56/2923          | 104/8041       | 0.000186709   | 0.000701244     | 0.000365648   |
